# Supplementary material for: Hedgehog Acyltransferase Promotes Uptake of Palmitoyl-CoA across the Endoplasmic Reticulum Membrane
Source: PubMed Central journal article supplement — Cell Rep. Author manuscript; Available in PMC 2020 Jan 8. (PMC6948154; doi:10.1016/j.celrep.2019.11.110), 2019-12-24
Supplement: NIHMS1547527-supplement-1.pdf [file NIHMS1547527-supplement-1.pdf]

**Cell Reports, Volume 29**

**Supplemental Information**

**Hedgehog Acyltransferase Promotes  
Uptake of Palmitoyl-CoA across the  
Endoplasmic Reticulum Membrane**

**James J. Ascioffa and Marilyn D. Resh**

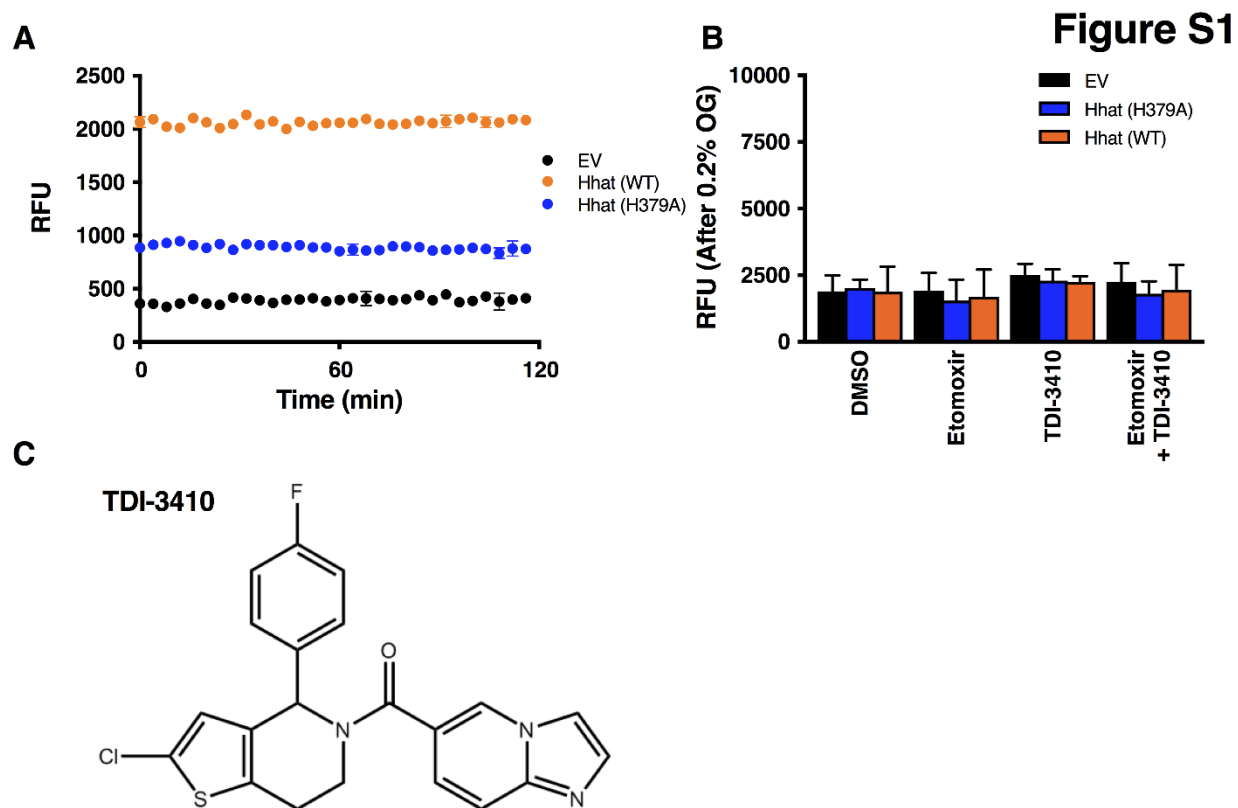

**Figure S1, related to Figure 2.**

(A,B) Microsomal membranes from HEK293FT cells expressing EV, Hhat WT, or Hhat H379A were incubated with NBD-palmitoyl-CoA for 60 minutes at room temperature prior to the addition of  $\text{Na}_2\text{S}_2\text{O}_4^{2-}$ . RFU readings were recorded every 2 minutes for 120 minutes (A), followed by the addition of 0.2% octyl glucoside (B);  $n=3$ . (C) Structure of TDI-3410.

**A**

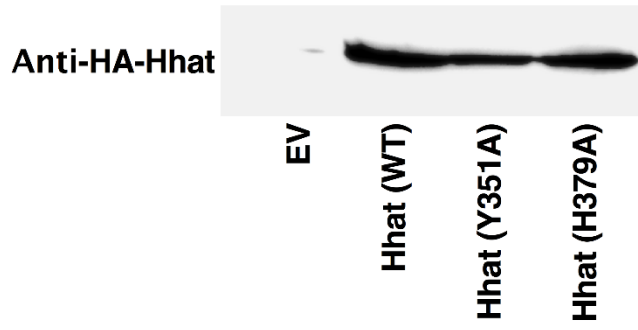

**Figure S2**

**Figure S2, related to Figure 7.**

Anti-HA Western blot of wild type and Hhat mutant expression in microsomal membranes prepared from transfected HIK293FT cells.
